# Supplementary material for: Thioredoxin-interacting protein regulates haematopoietic stem cell ageing and rejuvenation by inhibiting p38 kinase activity
Source: PubMed Central journal article supplement (PMC5155146; doi:10.1038/ncomms13674), 2016-12-08
Supplement: ncomms13674-s1.pdf [file ncomms13674-s1.pdf]

# Supplementary Figure 1

**a**

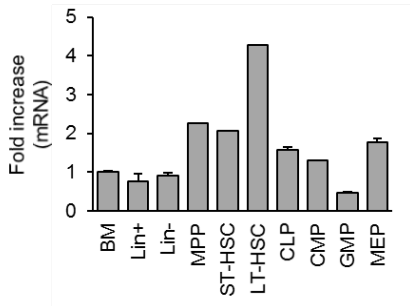

**b**

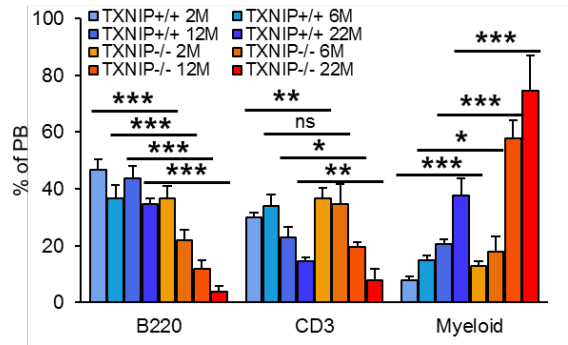

**c**

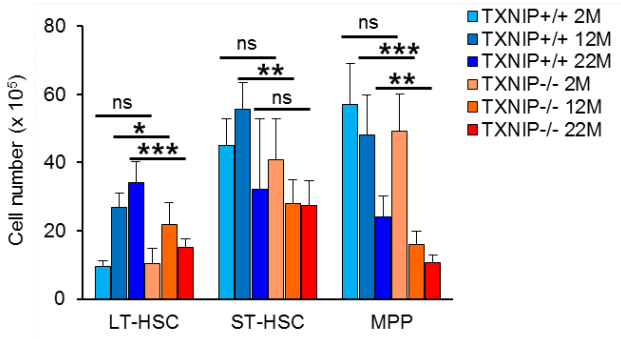

**d**

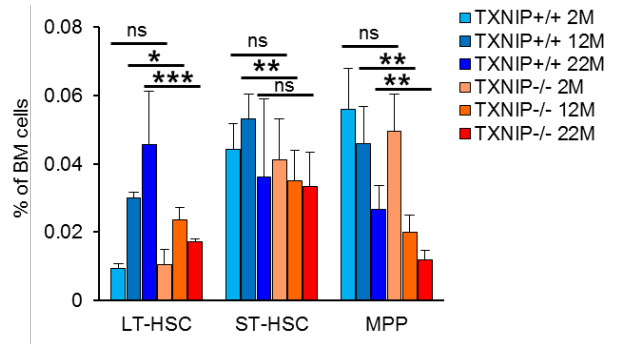

**e**

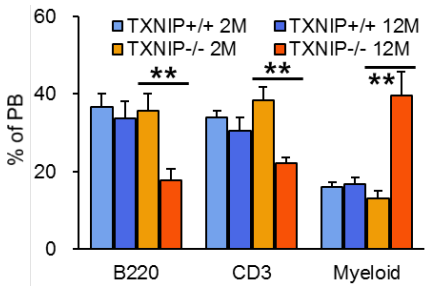

**f**

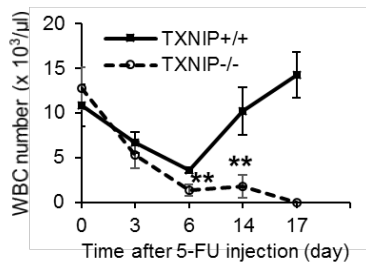

**g**

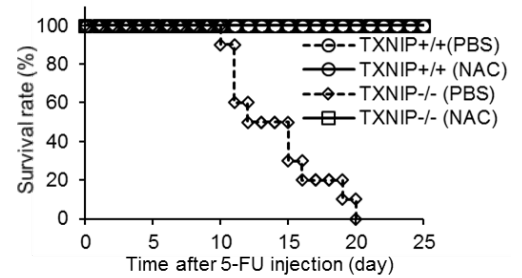

**h**

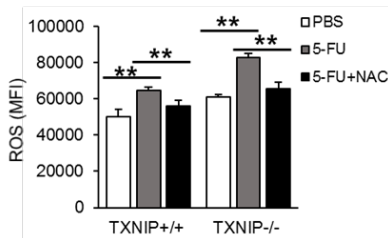

**i**

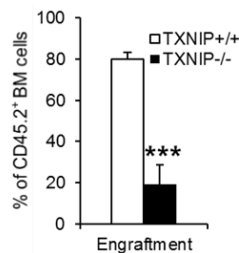

**j**

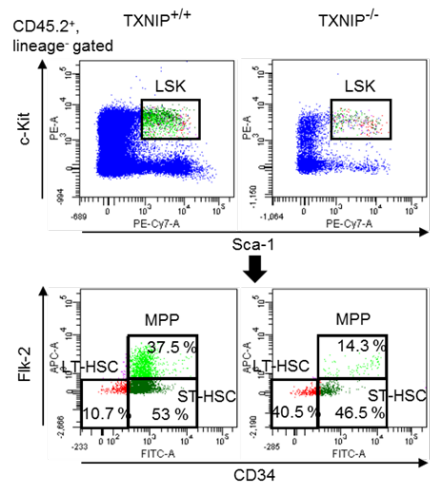

**Supplementary Figure 1. Ageing phenotypes of *TXNIP*<sup>-/-</sup> HSCs in mice.** (a) Quantitative real-time PCR of *TXNIP* in indicated subsets (n=3). (b) Percentage of B220<sup>+</sup>, CD3<sup>+</sup> and myeloid cells in PB. (c,d) Absolute number (c) and the frequency of LT-HSCs, ST-HSCs and MPPs in BM cells (d)(n=6). (e) Percentage of B220<sup>+</sup>, CD3<sup>+</sup> and myeloid cells in PB of female mice (n=7-10). (f) WBCs in PB after 5-FU administration (n=5-6). (g) Survival rate of young *TXNIP*<sup>+/+</sup> or *TXNIP*<sup>-/-</sup> mice after 5-FU (150 mg kg<sup>-1</sup>) administration (n=10). NAC was i.p. injected 100 mg kg<sup>-1</sup> daily starting at day -1. (h) ROS levels of LT-HSCs. We i.p. injected 5-FU (150 mg kg<sup>-1</sup>) and NAC (100 mg kg<sup>-1</sup>) then examined ROS in HSCs after 24 hours (n=3). (i) Percentage of donor-derived cells in BM (n=5 from 2 experiments). (j) A representative gating image of LT-HSCs, ST-HSCs and MPPs of LSKs among donor derived BM cells. Data are mean ± s.d. Statistical significance was determined using a two-tailed Student's *t*-tests. \**P*< 0.05, \*\**P*< 0.01, \*\*\**P*<0.001.

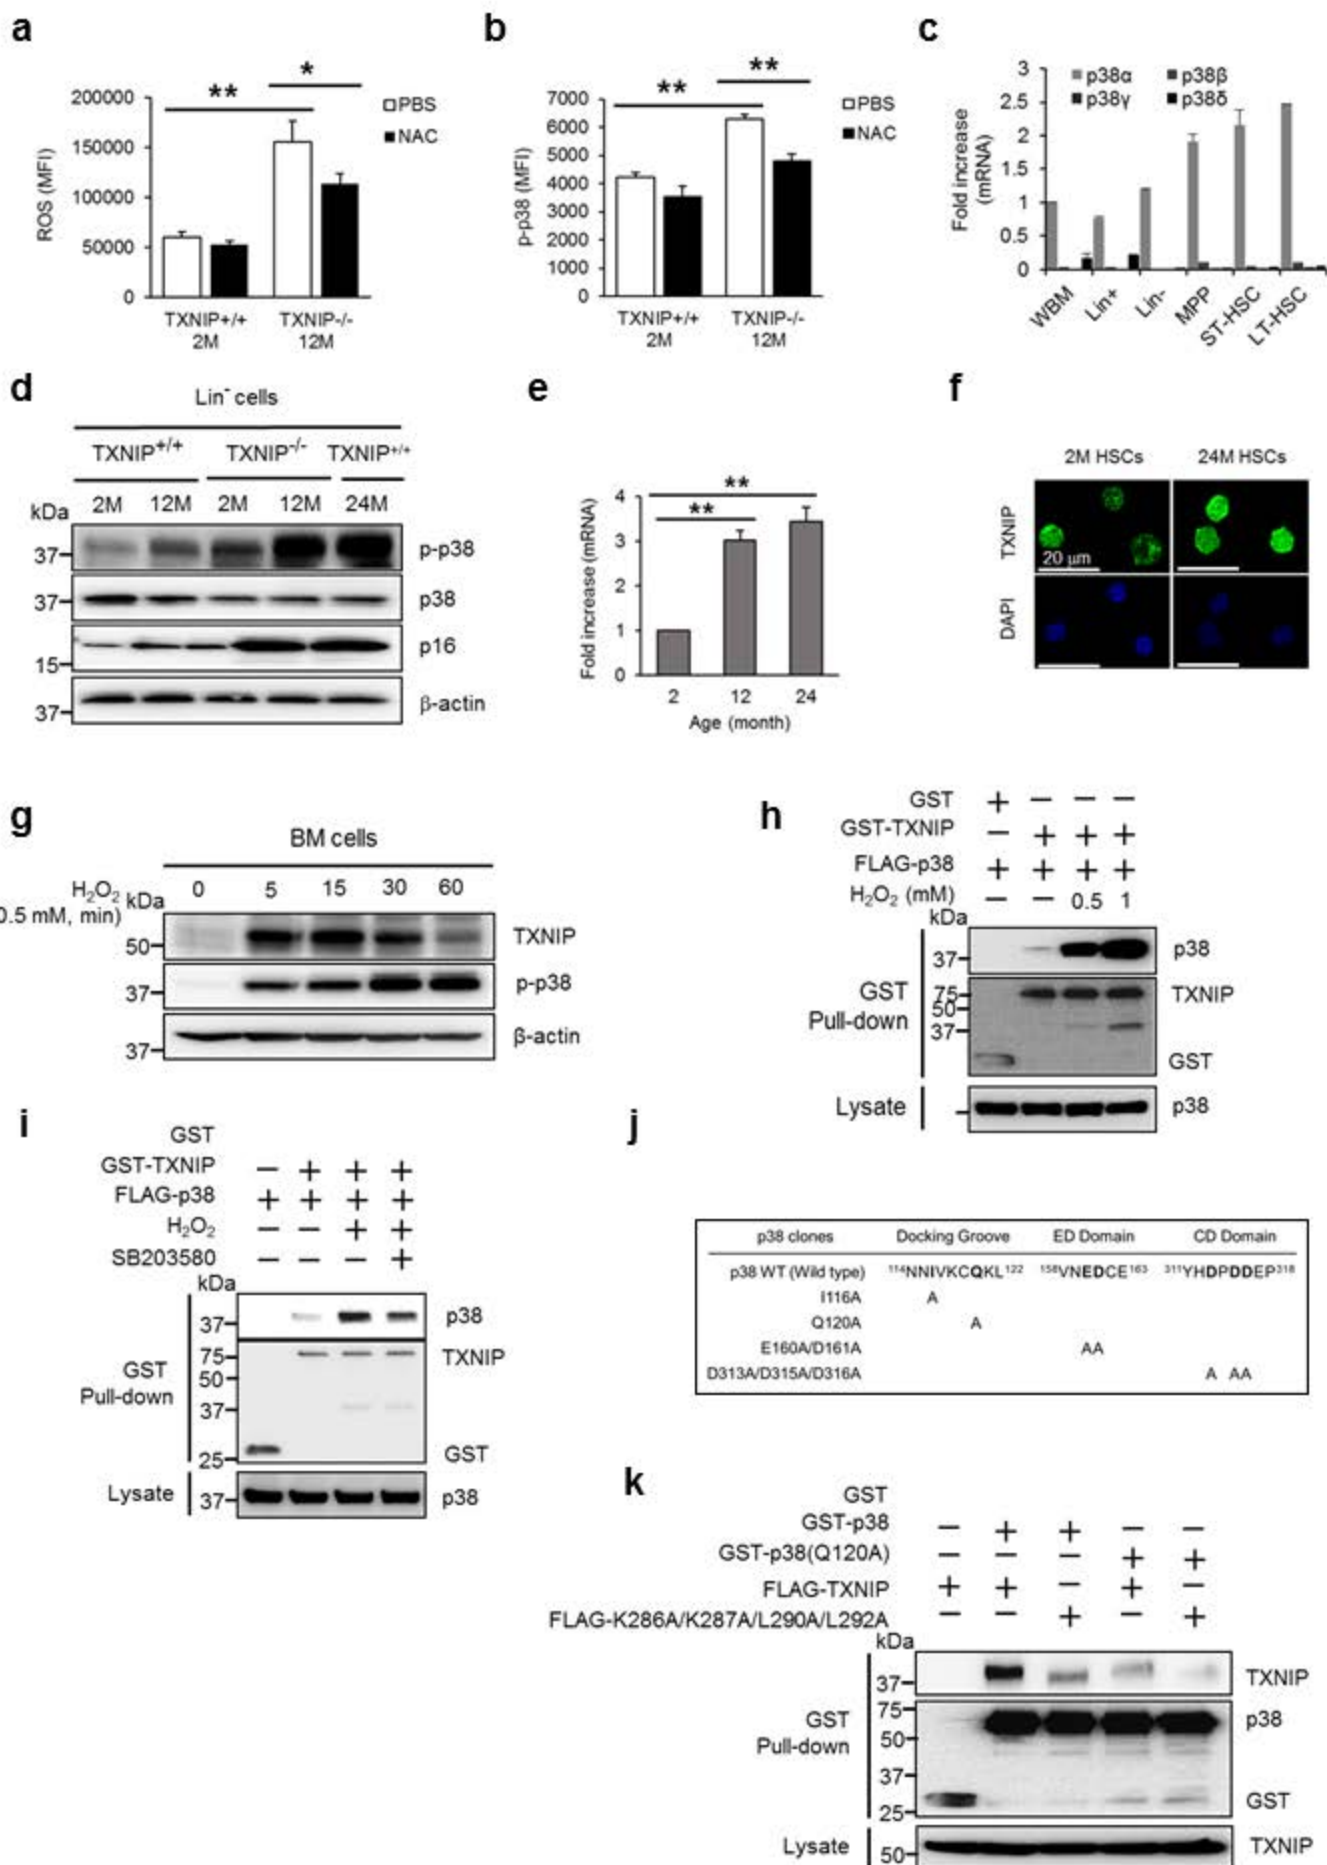

**Supplementary Figure 2. Expression of p38 and TXNIP in HSCs and their interaction.**

**(a,b)** ROS **(a)** and phospho-p38 level **(b)** of LT-HSCs after NAC treatment. We i.p. injected 100 mg kg<sup>-1</sup> NAC into mice then analyzed after 12 hours (n=3). **(c)** Quantitative real-time PCR of *p38* family in indicated subsets (n=3). **(d)** Western blot analyses of lin<sup>-</sup> cells (repeated 3 times). **(e)** Real-time PCR of *TXNIP* in LT-HSCs (n=3). **(f)** Confocal images of TXNIP in LT-HSCs (repeated 3 times). **(g)** Western blot analyses of BM cells (repeated 2 times). **(h,i)** GST pull-down assay (repeated 3 times). **(j)** Constructed *p38* mutant clones. **(k)** GST pull-down assays between TXNIP and p38 mutants (repeated 3 times). Data are mean ± s.d. Statistical significance was determined using a two-tailed Student's *t*-tests. \*\**P* < 0.01.

# Supplementary Figure 3

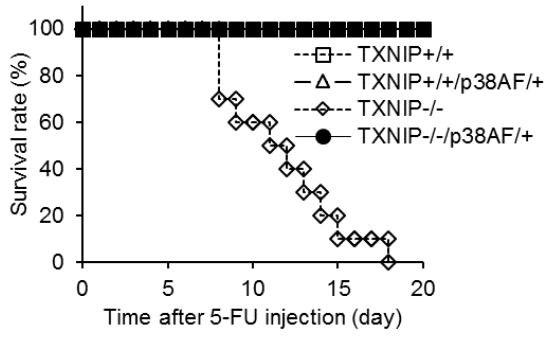

**Supplementary Figure 3. Mice survival under haematopoietic stress.**

Survival rate of young *TXNIP*<sup>+/+</sup> (n=10), *TXNIP*<sup>-/-</sup> (n=10), *TXNIP*<sup>+/+</sup>/*p38*<sup>ΔF/+</sup> (n=7) or *TXNIP*<sup>-/-</sup>/*p38*<sup>ΔF/+</sup> (n=9) mice after 5-FU (150 mg kg<sup>-1</sup>) administration.

# Supplementary Figure 4

**a**

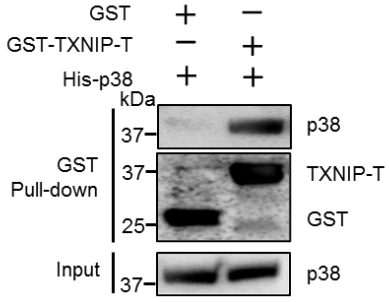

**b**

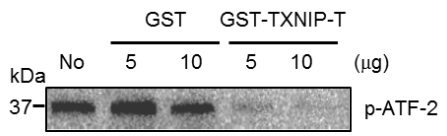

**c**

| Peptide Clones        | TXNIP amino acid sequence                                        |
|-----------------------|------------------------------------------------------------------|
| PLV-GFP-5xlinker-TN15 | Basic $\phi_A$ -X- $\phi_B$<br>284GSKKVILDLPLVIGS <sup>298</sup> |
| PLV-GFP-5xlinker-TN14 | 284GSKKVILDLPLVIG <sup>297</sup>                                 |
| PLV-GFP-5xlinker-TN13 | 284GSKKVILDLPLVI <sup>296</sup>                                  |
| PLV-GFP-5xlinker-TN12 | 284GSKKVILDLPLV <sup>295</sup>                                   |

**d**

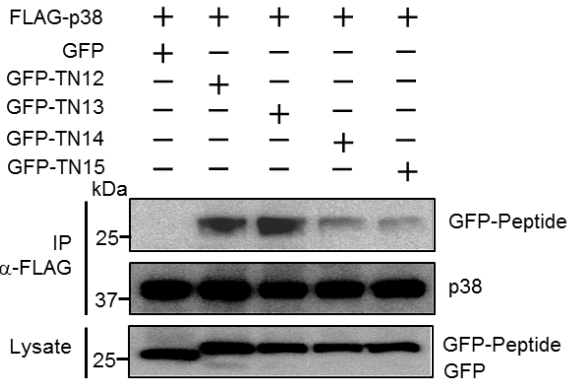

**e**

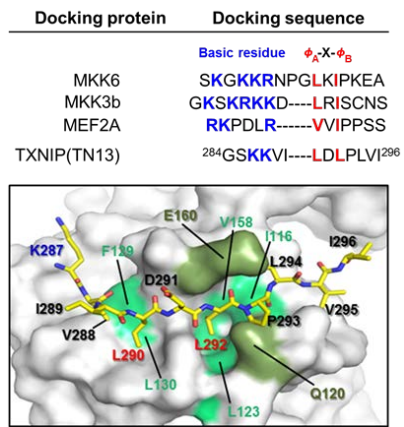

**f**

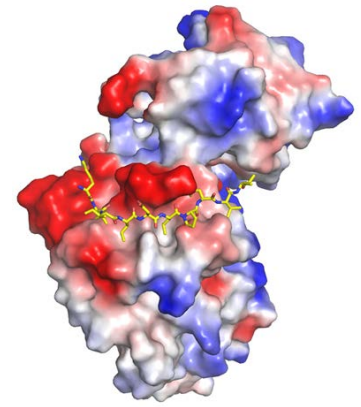

**g**

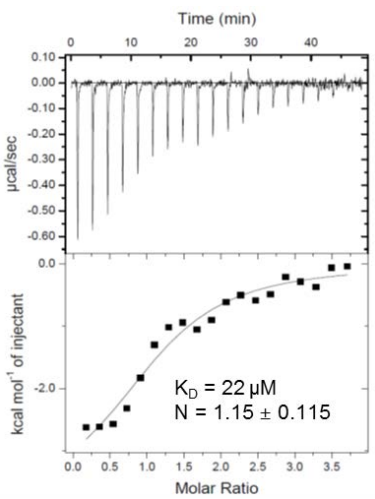

**h**

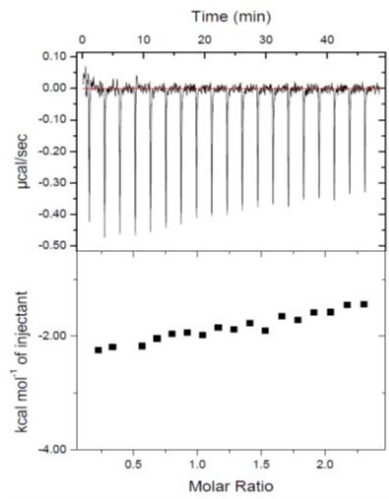

**i**

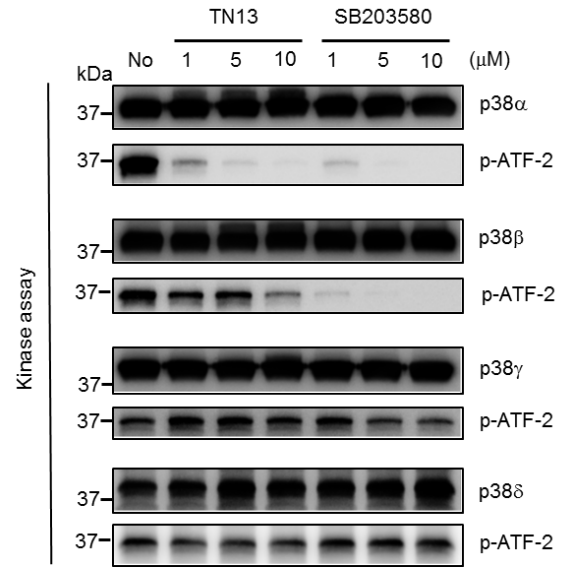

**Supplementary Figure 4. TXNIP interacts with p38 and inhibits p38 kinase activity *in vitro*.** (a) GST pull-down assay between His-p38 and GST or GST-TXNIP-T (repeated 3 times). (b) *In vitro* kinase assay for p38 (repeated 2 times). (c) Lenti-viral clones for *GFP*-peptide. (d) Immunoprecipitation assays for p38-GFP-peptide interaction (repeated 3 times). (e) Surface model of p38 with TXNIP peptide. (f) Surface model between p38 and TN13 peptide with electrostatic potentials. (g,h) Isothermal titration calorimetry (ITC) assay. His-p38 with TAT-TN13 (g) and His-p38 with TAT (h) (repeated 2 times). (i) *In vitro* kinase assay for p38 isoforms. (repeated 2 times).



# Supplementary Figure 5

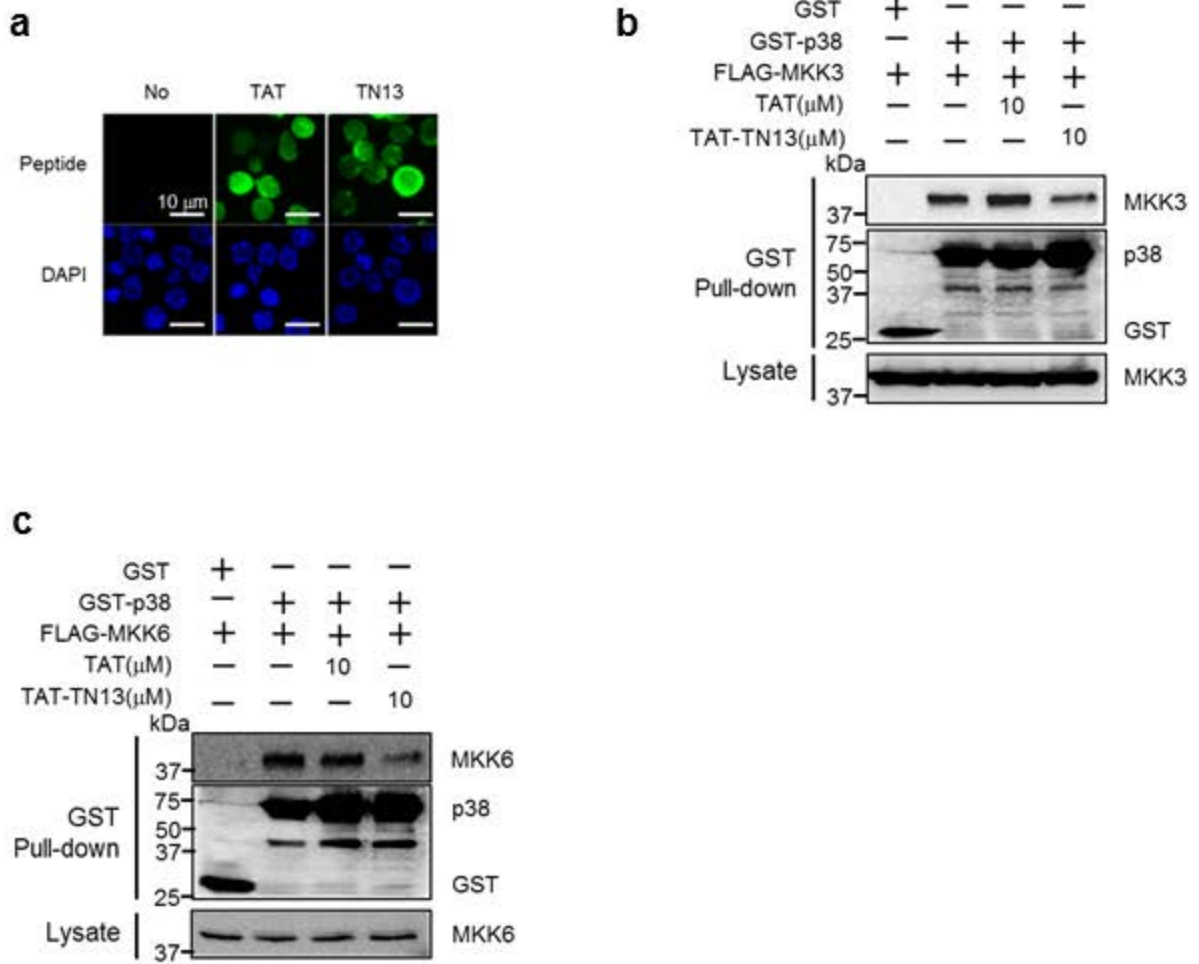

**Supplementary Figure 5. TAT-TN13 peptide competes with MKK3 or MKK6 for p38 inhibition.** (a) Confocal images of penetrated peptides in old HSCs. Sorted old HSCs were treated with 10  $\mu$ M of TAT or TAT-TN13 in HSC media for 1 hour (repeated 2 times). (b,c) GST pull-down assay between p38 and MKK3 (b) or MKK6 (c) in 293T cells. Cells were treated with 10  $\mu$ M of TAT or TAT-TN13 for 1 hour (repeated 2 times).

# Supplementary Figure 6

**a**

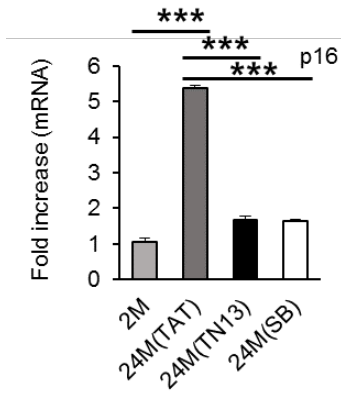

**b**

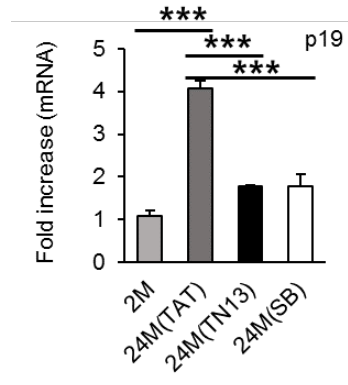

**c**

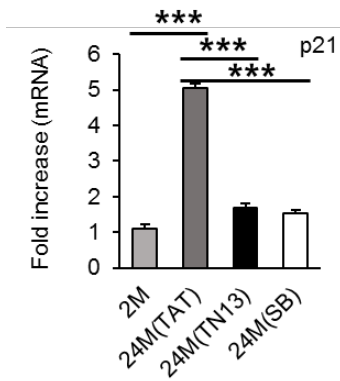

**d**

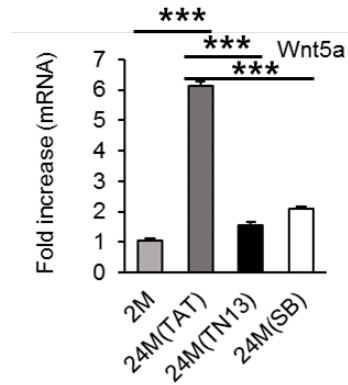

**Supplementary Figure 6. Long-term regulation of ageing-associated genes in HSCs by TAT-TN13 treatment *in vivo*.**

**(a-d)** Quantitative real-time PCR of ageing-associated genes in donor derived  $CD45.2^+$  HSCs. After competitive transplantation assay, we isolated  $CD45.2^+$  LT-HSCs from recipients and analyzed the expression of ageing associated genes using real-time PCR.

# Supplementary Figure 7

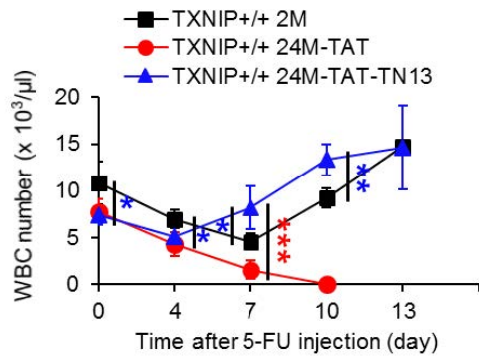

**Supplementary Figure 7. Enhanced restoration of WBCs in old mice by TAT-TN13 treatment under haematopoietic stress.**

WBCs in PB after 5-FU ( $100 \text{ mg kg}^{-1}$ ) administration (n=5-6 from 2 experiments). Data are mean  $\pm$  s.d. Statistical significance was determined using a two-tailed Student's *t*-tests. \* $P < 0.05$ , \*\* $P < 0.01$ , \*\*\* $P < 0.001$ .

# Supplementary Figure 8

Fig. 2e

|                                        |   |   |   |   |   |   |
|----------------------------------------|---|---|---|---|---|---|
| GST                                    | + | + | - | - | - | - |
| GST-TXNIP                              | - | - | + | + | + | + |
| FLAG-p38                               | + | + | + | + | - | - |
| FLAG-p38AF                             | - | - | - | - | + | + |
| H <sub>2</sub> O <sub>2</sub> (0.5 mM) | - | + | - | + | - | + |

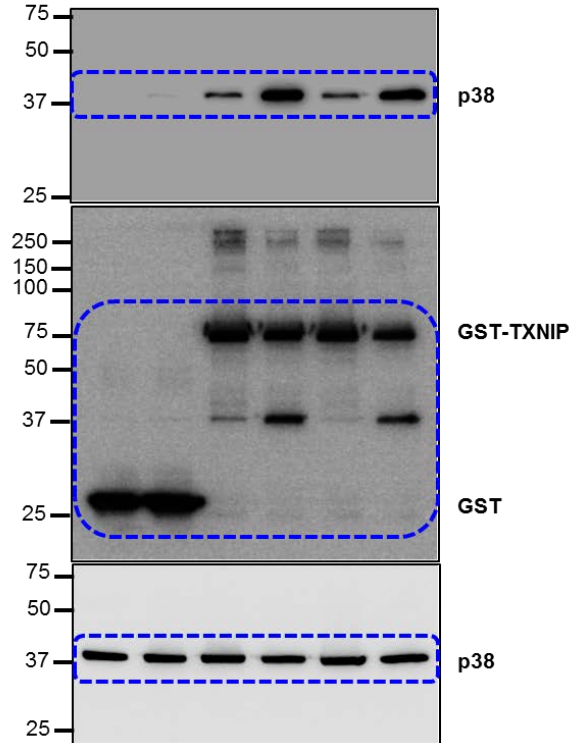

Fig. 2c

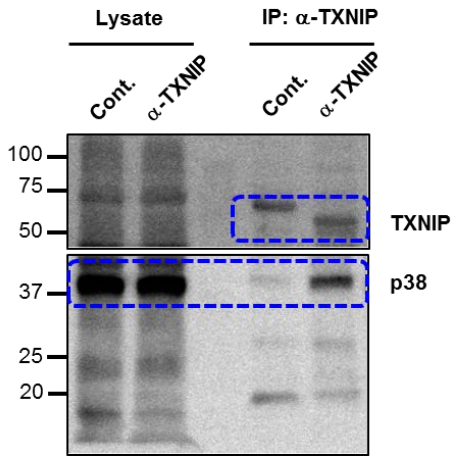

Fig. 2f

|                  |   |   |   |   |   |   |
|------------------|---|---|---|---|---|---|
| GST              | + | - | - | - | - | - |
| GST-p38          | - | + | + | + | + | + |
| FLAG-TXNIP       | + | + | - | - | - | - |
| FLAG-V178A/V180A | - | - | + | - | - | - |
| FLAG-I208A/V210A | - | - | - | + | - | - |
| FLAG-I278A/V280A | - | - | - | - | + | - |
| FLAG-L290A/L292A | - | - | - | - | - | + |

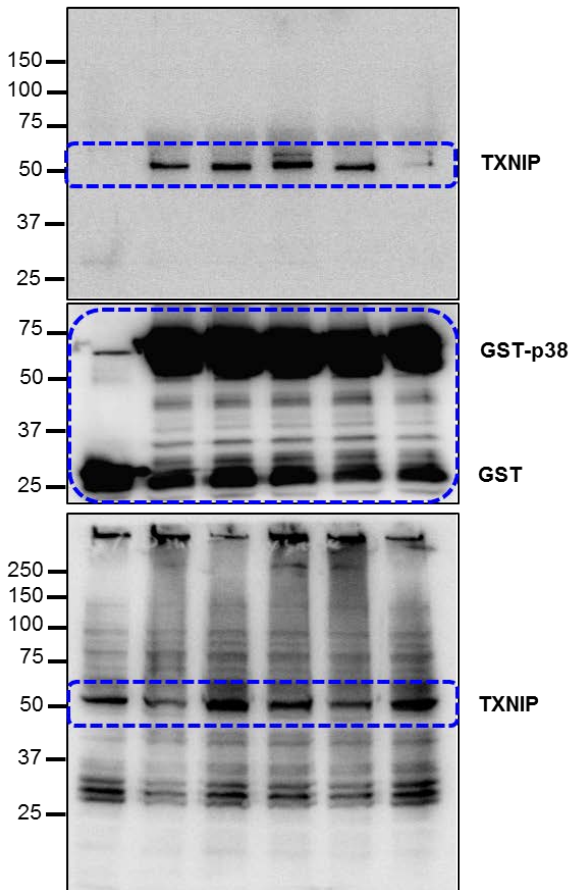

Supplementary Figure 8 Continued

Fig. 2g

|                        |   |   |   |   |   |   |
|------------------------|---|---|---|---|---|---|
| GST                    | + | - | - | - | - | - |
| GST-TXNIP              | - | + | + | + | + | + |
| FLAG-p38               | + | + | - | - | - | - |
| FLAG-I116A             | - | - | + | - | - | - |
| FLAG-Q120A             | - | - | - | + | - | - |
| FLAG-E160A/D161A       | - | - | - | - | + | - |
| FLAG-D313A/D315A/D316A | - | - | - | - | - | + |

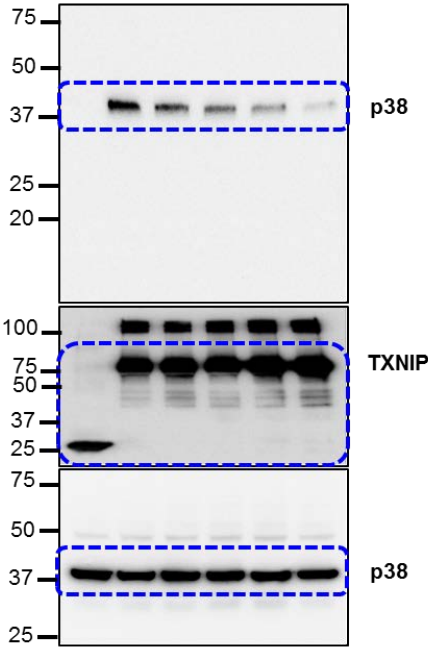

Fig. 4a

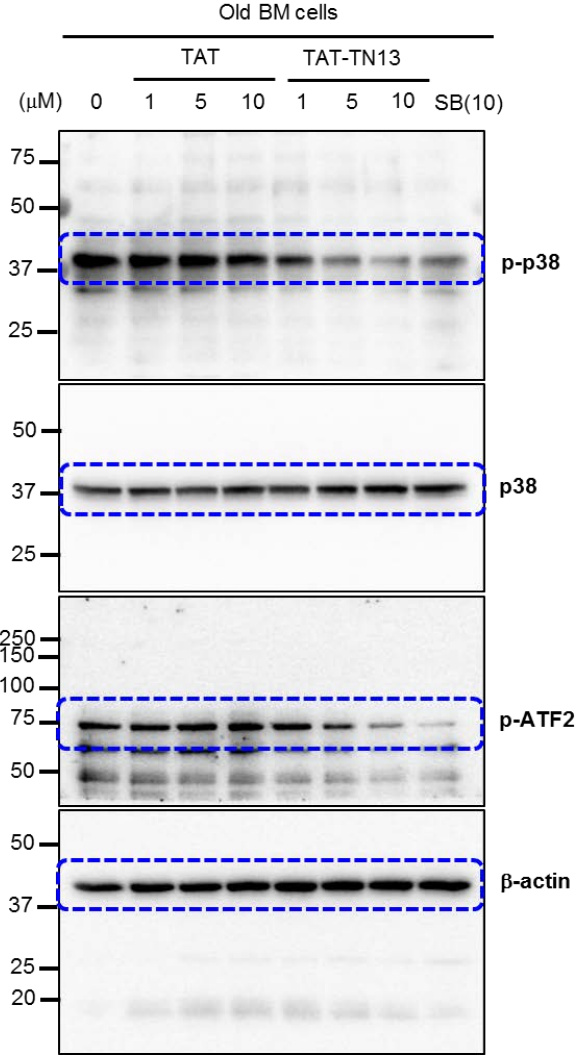



# Supplementary Figure 8 Continued

## Supplementary Fig. 2d

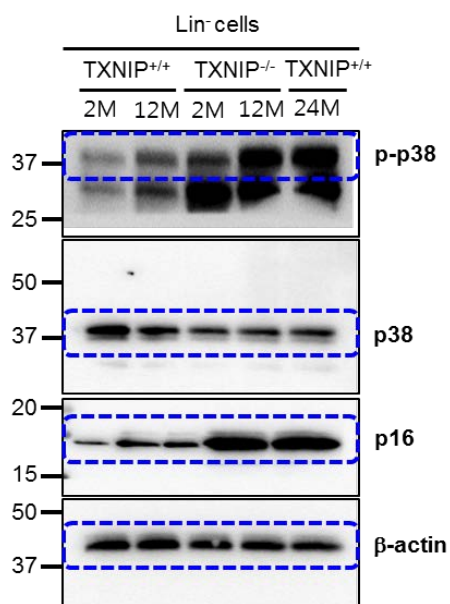

## Supplementary Fig. 2h

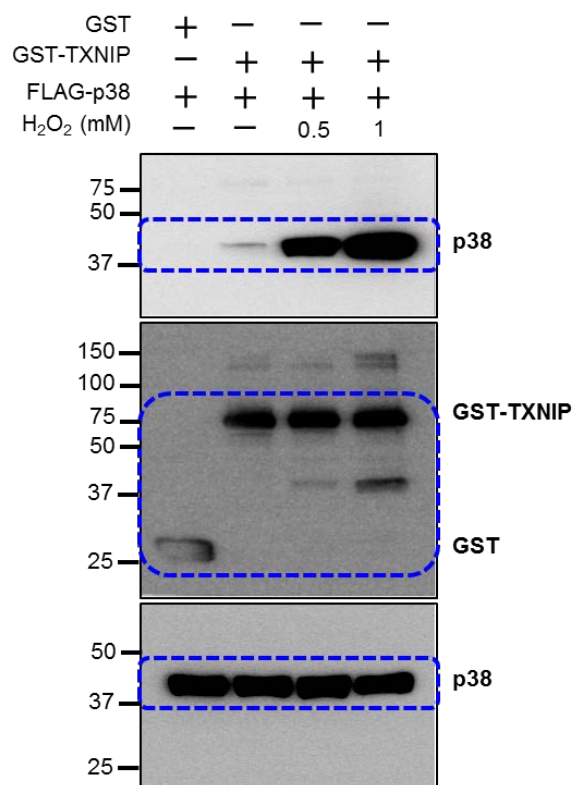

## Supplementary Fig. 2k

| GST                          | + | - | - | - | - |
|------------------------------|---|---|---|---|---|
| GST-p38                      | - | + | + | - | - |
| GST-p38(Q120A)               | - | - | - | + | + |
| FLAG-TXNIP                   | + | + | - | + | - |
| FLAG-K286A/K287A/L290A/L292A | - | - | + | - | + |

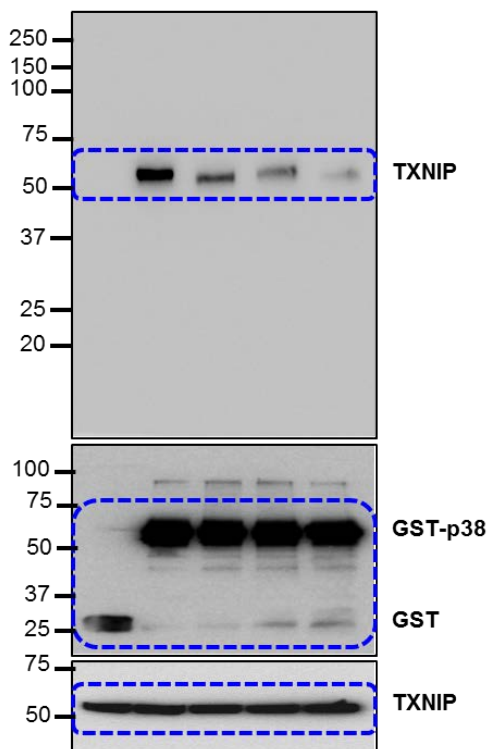

# Supplementary Figure 8 Continued

## Supplementary Fig. 4a

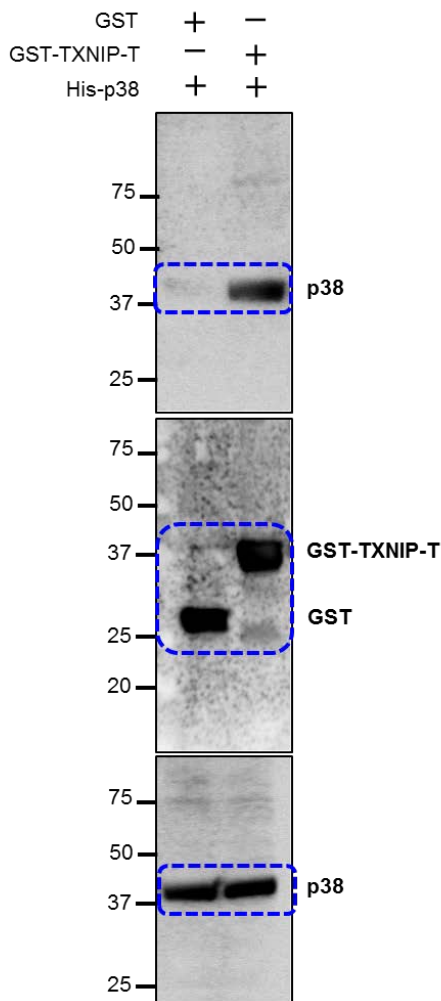

## Supplementary Fig. 4d

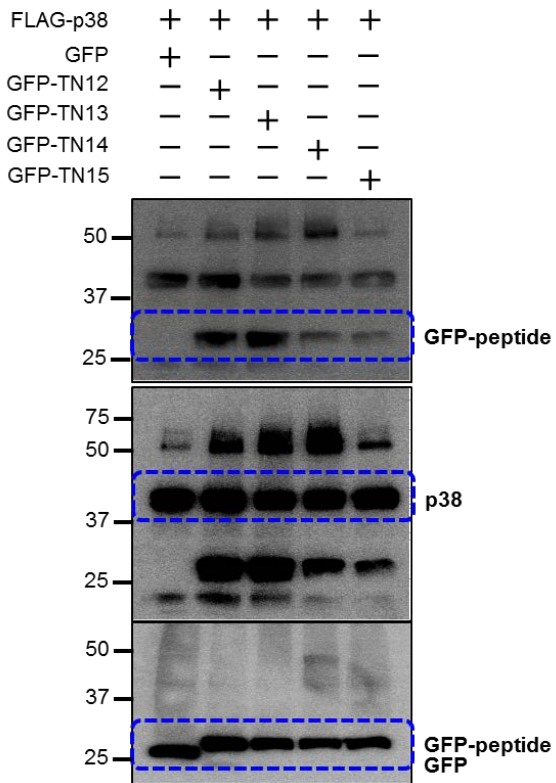

## Supplementary Fig. 4i

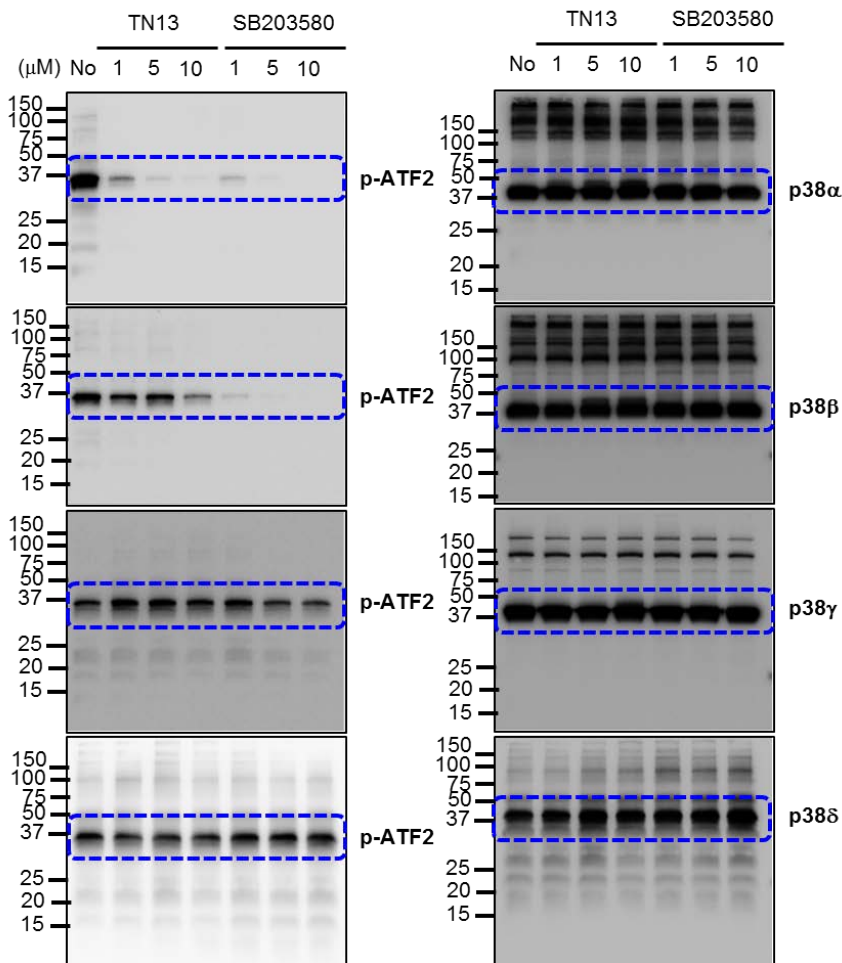

# Supplementary Figure 8 Continued

Supplementary Fig. 5b

|                    |   |   |    |    |
|--------------------|---|---|----|----|
| GST                | + | - | -  | -  |
| GST-p38            | - | + | +  | +  |
| FLAG-MKK3          | + | + | +  | +  |
| TAT( $\mu$ M)      | - | - | 10 | -  |
| TAT-TN13( $\mu$ M) | - | - | -  | 10 |

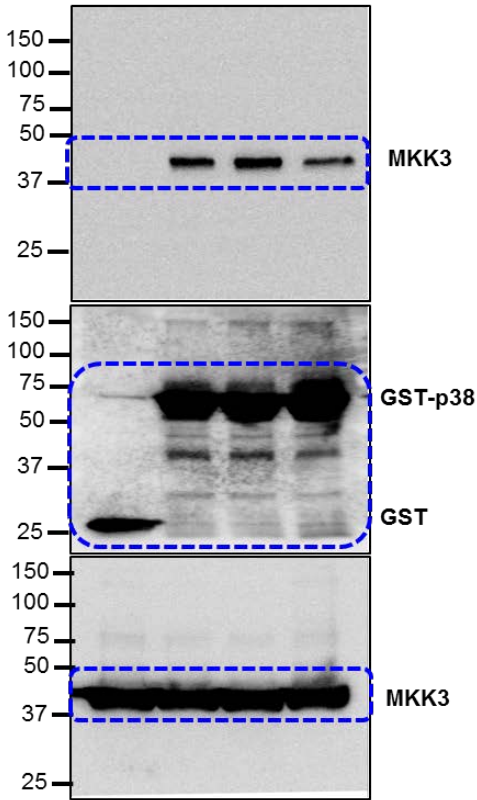

Supplementary Fig. 5c

|                    |   |   |    |    |
|--------------------|---|---|----|----|
| GST                | + | - | -  | -  |
| GST-p38            | - | + | +  | +  |
| FLAG-MKK6          | + | + | +  | +  |
| TAT( $\mu$ M)      | - | - | 10 | -  |
| TAT-TN13( $\mu$ M) | - | - | -  | 10 |

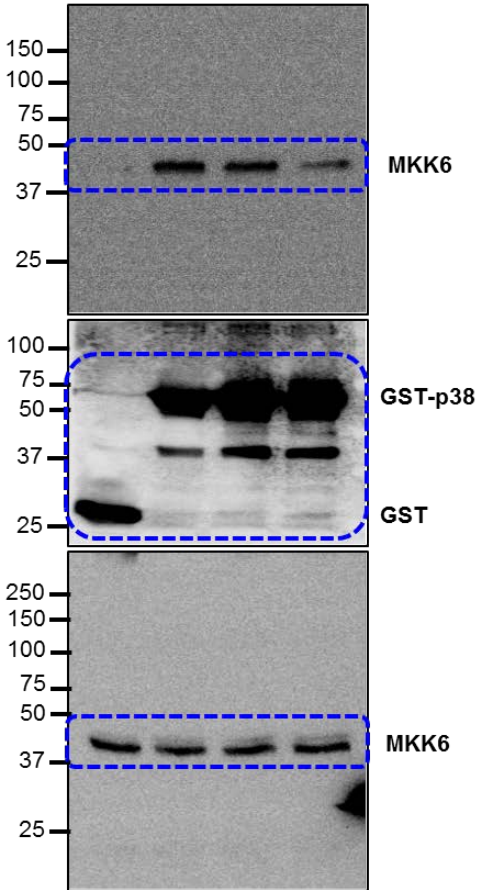

**Supplementary Figure 8. Uncropped, full Western blot images of important blots in indicated figures (Fig. 2c, 2e, 2f, 2g, 4a, Supplementary Fig. 2d, 2h, 2k, 4a, 4d, 4i, 5b, 5c).**
